# Supplementary material
Source: PubMed Central journal article supplement (PMC5942232)
Supplement: NIHMS939430-supplement-sup.pdf [file NIHMS939430-supplement-sup.pdf]

# Deep Multi-Task Multi-Channel Learning for Joint Classification and Regression of Brain Status

## –Supplementary Materials

Mingxia Liu<sup>†</sup>, Jun Zhang<sup>†</sup>, Ehsan Adeli, and Dinggang Shen<sup>‡</sup>

Department of Radiology and BRIC, University of North Carolina at Chapel Hill, North Carolina 27599, U.S.A.

### 1 Results of Multi-class Disease Classification

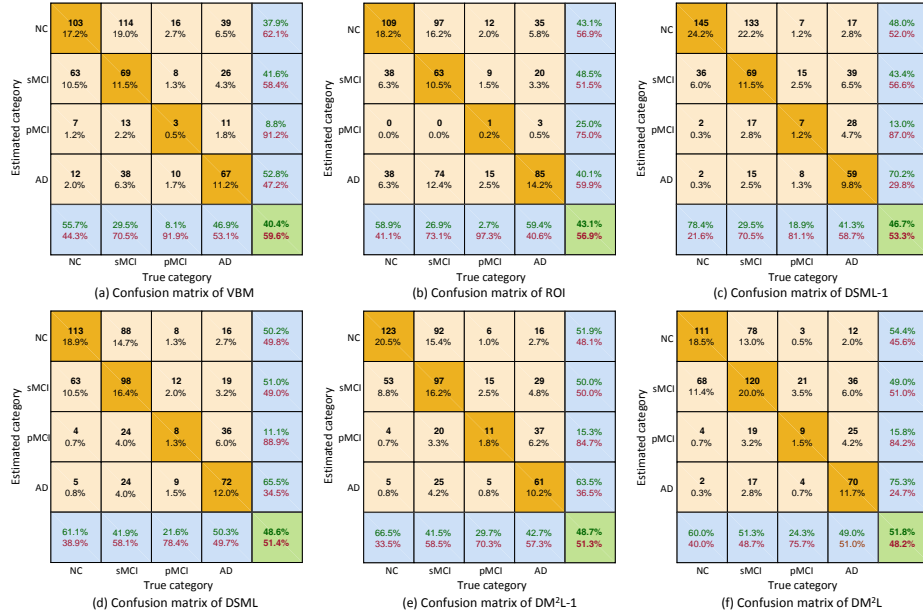

**Fig. S1.** Confusion matrices achieved by six different methods in multi-class (NC vs. sMCI vs. pMCI vs. AD) disease classification.

We further show the multi-class classification (NC vs. sMCI vs. pMCI vs. AD) achieved by our proposed deep multi-task multi-channel learning (DM<sup>2</sup>L) approach and five competing methods (*i.e.*, VBM [1], ROI [2], DSML-1, DSML,

<sup>†</sup> These authors contribute equally to this paper.

<sup>‡</sup> Corresponding author: dgshen@med.unc.edu.

and DM<sup>2</sup>L-1). The confusion matrices achieved by different methods are reported in Fig. S1. From Fig. S1, we can see that in terms of the overall classification accuracy, the proposed DM<sup>2</sup>L method generally outperforms those competing methods. It further suggests the effectiveness of the proposed method.

## References

1. Baron, J., Chetelat, G., Desgranges, B., Perchey, G., Landeau, B., De La Sayette, V., Eustache, F.: In vivo mapping of gray matter loss with voxel-based morphometry in mild Alzheimer's disease. *NeuroImage* **14**(2) (2001) 298–309
2. Liu, M., Zhang, D., Adeli, E., Shen, D.: Inherent structure-based multiview learning with multitemplate feature representation for Alzheimer's disease diagnosis. *IEEE Transactions on Biomedical Engineering* **63**(7) (2016) 1473–1482
